# Supplementary material
Source: HighWire-hosted journal article supplement (https://cmajopen.ca/highwire/filestream/81210/field_highwire_adjunct_files/0/2018-0042-original-submission.pdf)
Supplement: 2018-0042-original-submission.pdf [file 2018-0042-original-submission.pdf]

1  
2 1 TITLE: Individual and Area Level Socioeconomic Inequalities in Diabetes in Saskatchewan between  
3 2 2007 and 2013: A cross-sectional analysis.  
4 3  
5 4

6 5 Authors: Daniel Fuller<sup>1</sup>, PhD, Joshua Neudorf<sup>2</sup> MSc, Stuart Lockhart<sup>3</sup>, MPH, Charles Plante<sup>2</sup>, MA, Lisa  
7 6 Thuraiyasu<sup>2</sup>, MSc, Hazel Roberts<sup>2</sup>, MSc, Thilina Bandara<sup>2</sup>, MPH, Cory Neudorf<sup>2</sup> MD  
8 7  
9 8

- 10 8  
11 9 1. Memorial University of Newfoundland  
12 10 2. University of Saskatchewan  
13 10  
14 11 3. Trinity College Dublin  
15 12

16 13 Corresponding Author:  
17 14 Cory Neudorf, MD, PhD  
18 15 Department of Community Health & Epidemiology  
19 16 Health Science Building, 107 Wiggins Road  
20 16 University of Saskatchewan  
21 17 Saskatoon, Saskatchewan, Canada S7N-5E5  
22 18 Phone: (306) 966-2276  
23 19 Fax: (306) 966-7920  
24 20 E-mail: [cory.neudorf@usask.ca](mailto:cory.neudorf@usask.ca)  
25 21  
26 22

27 22  
28 23 **TEXT WORD COUNT: 2406**  
29 24

30 25 **ABSTRACT WORD COUNT: 227**  
31 26

32 27 **NUMBER OF TABLES: 2**  
33 28

34 28  
35 29 **NUMBER OF FIGURES: 1**  
36 30  
37 31  
38  
39  
40  
41  
42  
43  
44  
45  
46  
47  
48  
49  
50  
51  
52  
53  
54  
55  
56  
57  
58  
59  
60

1  
2  
3  
4  
5  
6  
7  
8  
9  
10  
11  
12  
13  
14  
15  
16  
17  
18  
19  
20  
21  
22  
23  
24  
25  
26  
27  
28  
29  
30  
31  
32  
33  
34  
35  
36  
37  
38  
39  
40  
41  
42  
43  
44  
45  
46  
47  
48  
49  
50  
51  
52  
53  
54  
55  
56  
57  
58  
59  
60

## 1 Abstract

2 Background: Improving our understanding of social inequalities may improve prevention and treatment  
3 efforts for diabetes. Our objective is to examine the association between individual and area level  
4 socioeconomic measures and physician diagnosed diabetes in Saskatchewan over time.

5  
6 Methods: In this cross sectional study we link health administrative data with individual level  
7 socioeconomic data from the Canadian Community Health Survey and area level data from the 2006  
8 Canadian Census. We use General Linear Mixed Models regression to analyze the effect of each,  
9 controlling for geographic and demographic measures.

10  
11 Results: Area level deprivation is associated with medically diagnosed type 2 diabetes mellitus after  
12 adjusting for individual level factors: age, sex, household income and education. Individuals residing in  
13 areas ranked in the least deprived quintile (Q1) have a lower likelihood of diabetes compared to those in  
14 the most deprived quintile (Q5) (OR = 0.40, 95% CI = 0.18 to 0.88). However, this disparity is found to  
15 only exist in urban areas. This may reflect smaller health inequalities in rural areas, greater  
16 socioeconomic heterogeneity, and/or larger geographic units.

17  
18 Interpretation: Individual and area level socioeconomic factors are associated with the likelihood of  
19 medically diagnosed diabetes, however, the strength of this association varies between urban and rural  
20 communities. Acknowledgement of area level deprivation as a modifiable risk factor related to the  
21 prevalence of diabetes is important in the development of effective interventions in urban, but not rural,  
22 areas.

1  
2 1 Studies examining the association between socioeconomic deprivation and diabetes have shown that  
3  
4 2 inequalities exist at the individual and area levels.<sup>1-3</sup> A systematic review and meta-analysis showed  
5  
6 3 that low income individuals had a relative risk of diabetes that was 1.4 times (95% CI: 1.04-1.88)  
7  
8 4 greater than high income individuals.<sup>1</sup> Studies in Canada have shown associations between area level  
9  
10 5 deprivation and diabetes.<sup>2</sup> This work has led arguments that addressing geographic variation in health  
11  
12 6 services factors and socioeconomic deprivation are essential for population health improvements.<sup>3,4</sup>  
13  
14  
15  
16 7

17  
18 8 One challenge researchers confront in studying socioeconomic variation in health research is variation  
19  
20 9 in geographic units between urban and rural areas. Past research has demonstrated that area level  
21  
22 10 socioeconomic deprivation measures may be biased in rural areas because of the large land area and  
23  
24 11 heterogeneity of socioeconomic characteristics compared to the smaller urban land area of equal  
25  
26 12 population size.<sup>5,6</sup> At the individual level, a deprivation index may not be appropriate for differentiating  
27  
28 13 between urban and rural areas, and a single item measure, such as income may be more appropriate.<sup>6</sup>  
29  
30  
31  
32 14

33  
34 15 Guided by the World Health Organization Urban HEART (Health Equity Assessment and Response  
35  
36 16 Tool) <sup>7</sup> we have developed our local indicators including area level deprivation and individual level  
37  
38 17 income and education. We examine the association between area level socioeconomic deprivation and  
39  
40 18 individual level income and education, and medically diagnosed diabetes in Saskatchewan between  
41  
42 19 2007 and 2012. We hypothesize that both area level socioeconomic deprivation and individual income  
43  
44 20 and education will be associated with diabetes over time but that this effect will be modified by urban  
45  
46 21 and rural contexts.  
47  
48  
49  
50 22

## 51 23 **Methods**

52  
53 24 This cross-sectional study examined individual medically diagnosed prevalent cases of diabetes in  
54  
55 25 Saskatchewan using health administrative data linked to individual level socioeconomic (SES) from the  
56  
57  
58  
59  
60

1  
2 1 Canadian Community Health Survey and linked again with area level SES information derived from  
3  
4 2 the 2006 Canadian Census (see Figure 1). These linkages were required because individual  
5  
6 3 socioeconomic data are not available in health administrative data. Health administrative data does  
7  
8 4 contain patient postal code, allowing us to link administrative data to area level census geographies.  
9  
10  
11 5

12  
13 6 This linkage was carried out using a unique identifier that is assigned by the Government of  
14  
15 7 Saskatchewan to all those eligible for health services. These individuals were linked to Dissemination  
16  
17 8 Areas using Statistics Canada's Postal Code Conversion File<sup>8</sup> to convert the postal codes assigned to  
18  
19 9 the individual records to Dissemination Area level variables derived from the 2006 Census (n=2,431).<sup>9</sup>  
20  
21 10 Health administrative, Canadian Community Health Survey, and Postal Code Conversion File datasets  
22  
23 11 are reliable, valid, and commonly used datasets for examining social inequities in health.  
24  
25  
26  
27 12

### 28 29 13 *Diabetes*

30  
31  
32 14 Our analysis is based on the yearly period prevalence of diabetes. All cases of diabetes in those age > 1  
33  
34 15 in a given year are included in the analysis. We define a prevalent case of diabetes in a given year as a  
35  
36 16 person with one or more hospital discharge records with a diagnosis of diabetes in any diagnostic field  
37  
38 17 of ICD-10-CA: E10, E11, E12 or E14 and/or two or more physician service claims within a 730 day (2  
39  
40 18 year) period with a diabetes diagnosis of ICD-9: 250.<sup>10</sup> We remove cases of gestational diabetes.

41  
42  
43 19 Multiple hospital or physician visits on the same day are counted only once. We removed transfers of  
44  
45 20 the same patient between hospitals to avoid double counting.  
46  
47

### 48 21 49 50 22 *Area Level SES*

51  
52 23 The area level unit of analysis is the dissemination area, which consists of 400-700 persons and is the  
53  
54 24 smallest geography available. Area level SES was operationalized using the Dissemination Area level  
55  
56 25 deprivation index developed by Pampalon and colleagues obtained from the *Institut National De Santé*  
57  
58  
59

1  
2 1 *Publique*.<sup>11</sup> This index is made up of two dimensions: material and social deprivation. The material  
3  
4 2 deprivation dimension, which contains the proportion of people age 15 years and older without a high  
5  
6 3 school diploma, the employment/population ratio of people aged 15 years and older, and the average  
7  
8 4 income of people ages 15 years and older. The social deprivation dimension contains the proportion of  
9  
10 5 individuals aged 15 years and older living alone, the proportion of individuals aged 15 years and older  
11  
12 6 who are separated, divorced or widowed, and the proportion of single-parent families. We combine  
13  
14 7 material and social deprivation scores to create quintiles of total deprivation for each Dissemination  
15  
16 8 Area in Saskatchewan.<sup>16</sup>  
17  
18  
19  
20  
21  
22

### 23 10 *Individual Level SES*

24  
25 11 We control for education and household income. Education is operationalized as the highest level of  
26  
27 12 education achieved (Canadian Community Health Survey derived variable EDUDR04) and is  
28  
29 13 categorized as less than high school education, completed high school, or completed or some post-  
30  
31 14 secondary education. Income is measured as total household income from all sources (Canadian  
32  
33 15 Community Health Survey derived variable INCDHH). Income is separated into categories of \$0-  
34  
35 16 \$19,999, \$20,000-\$49,999, \$50,000-\$79,000, or >\$80,000. We chose these categorizations to represent  
36  
37 17 the education and income distribution while ensuring sufficient sample size in each category.  
38  
39  
40  
41  
42

### 43 19 *Covariates*

44  
45 20 We also include as covariates age, gender and whether individuals live in urban or rural areas. Age is  
46  
47 21 categorized as <35, 35-44, 45-59, 60-79, or >80 years old and gender is self-reported in the Canadian  
48  
49 22 Community Health Survey. Urban areas are defined as Dissemination Areas having a population  
50  
51 23 concentration of 1,000 or more and a population density of 400 or more per square kilometer, the same  
52  
53 24 definition used in the Canadian Community Health Survey. We also included dummy variables for  
54  
55 25 years 2007 through 2011 to control for periodic variation.  
56  
57  
58  
59  
60

1  
2  
3  
4  
5  
6  
7  
8  
9  
10  
11  
12  
13  
14  
15  
16  
17  
18  
19  
20  
21  
22  
23  
24  
25  
26  
27  
28  
29  
30  
31  
32  
33  
34  
35  
36  
37  
38  
39  
40  
41  
42  
43  
44  
45  
46  
47  
48  
49  
50  
51  
52  
53  
54  
55  
56  
57  
58  
59  
601  
2  
3  
4  
5  
6  
7  
8  
9  
10  
11  
12  
13  
14  
15  
16  
17  
18  
19  
20  
21  
22  
23  
24  
25  
26  
27  
28  
29  
30  
31  
32  
33  
34  
35  
36  
37  
38  
39  
40  
41  
42  
43  
44  
45  
46  
47  
48  
49  
50  
51  
52  
53  
54  
55  
56  
57  
58  
59  
60

## *Analysis*

We use multilevel logistic regression to estimate the prevalence of diabetes (Yes/No), controlling for random effects at the Dissemination Area level. We fit models for the population of Saskatchewan as a whole, and separate models for urban and rural areas. Multilevel models included bivariate screening for significance and a step up approach for multivariable model building. First, we fit null models. Second, we included area level factors. Third, we included all individual socioeconomic variables, covariates, and a categorical variable representing each year. All our models are fitted using SAS GLMM using maximum likelihood subject specific pseudo-likelihood estimation (MSPL). All reported results are weighted using the Canadian Community Health Survey weight variable (SAS analysis code available online: [https://github.com/walkabilly/diabetes\\_inequality](https://github.com/walkabilly/diabetes_inequality)).

## *Ethics Approval*

Ethical approval was obtained for the University of Saskatchewan Biomedical Research Ethics Board (Bio# 12-268).

## **Results**

There were 6,331,934 people covered by Saskatchewan Health between 2007 and 2012. On average, 1,055,322 people per year. We identified 98,121 prevalent cases of diabetes between 2007 and 2012. Across all years, the Canadian Community Health Survey data included 41,468 respondents who provided permission to link. We linked 15,720 individuals Saskatchewan Health data, including 1,516 prevalent cases of diabetes across all years. These individuals were linked to 1413 Dissemination Areas. Missing Dissemination Areas (1,018/2,431) were the result of our choice to use a single link indicator, meaning that postal codes that overlap multiple Dissemination Areas were assigned to only

1  
2 1 one. A small percentage of Dissemination Areas did not have Canadian Community Health Survey  
3  
4 2 derived deprivation data, others did not have diabetes cases.  
5

6  
7 3  
8  
9 4 Table 1 reports weighted and unweighted descriptive statistics for the variables used in our analysis.

10  
11 5 The following summarizes our weighted results. Across all years, the number of people with prevalent  
12  
13 6 diabetes is 7.6%. The youngest age group, less than 35 year old, represents 38.5% of the population and  
14  
15 7 the oldest 4.5%. Males and females represent 49.4% and 50.6% of the population, respectively. The  
16  
17 8 percentage of people with household income less than \$20,000 is 21.4% and 54.1% have a household  
18  
19 9 income greater than \$50,000 per year. The percentage of those with less than high school education is  
20  
21 10 24.2%, while 48.3% have some postsecondary. 22.3% of the population reside in rural areas.  
22  
23  
24

### 25 11 26 27 12 *The Association Between Individual and Area SES, and Diabetes*

28  
29 13 Table 2 reports the results of the three logistic regression models we fit for Saskatchewan as a whole,  
30  
31 14 for urban areas only, and for rural areas only. Level 2 denotes Dissemination Area level effects  
32  
33 15 variables, and level 1 individual level effects.  
34  
35

36 16  
37  
38 17 In the Saskatchewan model, compared to rural areas, urban areas had a lesser likelihood of diabetes  
39  
40 18 (OR = 0.46, 95% CI = 0.27 to 0.79). Compared to the most deprived area level quintiles, the least  
41  
42 19 deprived area level quintiles a lesser likelihood diabetes (OR = 0.40, 95% CI = 0.18 to 0.88). There are  
43  
44 20 no significant differences between quintiles 2, 3, and 4 and quintile 5, the most deprived quintile.  
45  
46

47 21 Individual level SES variables were associated with diabetes across the range of their distributions.

48  
49 22 Those earning incomes of \$20,000 to \$49,999 (OR = 0.64, 95% CI = 0.63 to 0.65), \$50,000 to \$79,000  
50  
51 23 (OR = 0.65, 95% CI = 0.64 to 0.67), and greater than \$80,000 (OR = 0.64, 95% CI = 0.63 to 0.66) had  
52  
53 24 a lower likelihood of diabetes compared to those earning less than \$20,000. Those with a less than a  
54  
55 25 high school education (OR = 1.51, 95% CI = 1.49 to 1.54) and a high school education (OR = 1.08,  
56  
57  
58  
59  
60

1  
2 1 95% CI = 1.06 to 1.10) were more likely to have been diagnosed with diabetes compared to those with  
3  
4 2 some postsecondary education.  
5

6  
7 3

#### 8 9 4 *Urban and Rural Associations*

10  
11 5 In stratified urban and rural models, urban areas showed the same relationships between SES and  
12  
13 6 period prevalence of diabetes as for Saskatchewan as a whole with those residing in the least deprived  
14  
15 7 quintile (Q1) having a lesser likelihood of diabetes compared to those residing in the most deprived  
16  
17 8 quintile (Q5) (OR = 0.32, 95% CI = 0.13 to 0.78). Area level deprivation was not associated with the  
18  
19 9 likelihood of diabetes in rural areas.  
20  
21

22  
23 10  
24  
25 11 Individual level SES variables are hypothesized to be associated with diabetes in both urban and rural  
26  
27 12 settings. In urban (OR = 0.72, 95% CI = 0.70 to 0.73) and rural (OR = 0.43, 95% CI = 0.41 to 0.45)  
28  
29 13 areas, those earning more than \$80,000 per year were less likely to be diagnosed with diabetes than  
30  
31 14 those earning less than \$20,000 per year. There is an income gradient for diabetes in both urban and  
32  
33 15 rural areas, however, the gradient is steeper in rural areas.  
34  
35  
36  
37 16

38  
39 17 In both urban (OR = 1.50, 95% CI = 1.47 to 1.53) and rural (OR = 1.43, 95% CI = 1.39 to 1.48) areas,  
40  
41 18 those with less than a high school education were more likely to be diagnosed with diabetes. However,  
42  
43 19 unlike in the province as a whole, those with a high school education in rural settings (OR = 0.87, 95%  
44  
45 20 CI = 0.84 to 0.91) were less likely to have been diagnosed with diabetes compared to those with some  
46  
47 21 postsecondary education.  
48  
49  
50  
51 22

#### 52 53 23 **Interpretation**

#### 54 55 24 *Summary of Findings*

56  
57  
58  
59  
60



1  
2 1 The objective of this study is to examine associations between individual and area level SES  
3  
4 2 deprivation and medically diagnosed diabetes in Saskatchewan between 2007 and 2012. As a  
5  
6 3 secondary objective, analyses were stratified by urban and rural to examine potential differences in the  
7  
8 4 relationship by region. Our results showed that area level deprivation is associated with medically  
9  
10 5 diagnosed diabetes mellitus after adjusting for individual level factors in Saskatchewan overall and in  
11  
12 6 urban areas. We did not detect area level inequalities in diabetes in rural areas.  
13  
14  
15  
16 7

### 18 8 *Explanation of Findings*

19  
20 9 The results were consistent with past research showing that area level SES deprivation is associated  
21  
22 10 with a greater likelihood of diabetes even when individual level SES characteristics are controlled. The  
23  
24 11 estimated association between area level SES deprivation and diabetes is higher than reported in  
25  
26 12 previous studies. Our results show a 2.5 times greater likelihood of diabetes in socioeconomically  
27  
28 13 disadvantaged areas. Previous research has estimated effects of 1.8 and 1.4 times greater likelihood of  
29  
30 14 diabetes, respectively.<sup>12,13</sup> Area level material deprivation is also predictive of the future risk of  
31  
32 15 diabetes for females (2.4 times greater risk) and males (1.6 times greater risk).<sup>14</sup>  
33  
34  
35  
36 16

37  
38  
39 17 At the individual level, and in Saskatchewan as a whole, our results show that individual level SES  
40  
41 18 deprivation is associated with greater period prevalence of diabetes. Income categories greater than  
42  
43 19 \$20,000 have less likelihood of diabetes compared to the less than \$20,000 household income groups  
44  
45 20 and a less than high school education and high school education levels are found to be associated with a  
46  
47 21 greater likelihood of diabetes compared to some post-secondary school.  
48  
49  
50 22

51  
52 23 In the model estimated over just urban areas, although all wealthier income groups fare better than the  
53  
54 24 least well off group, their gradient is the opposite of what one would be expected. This may be related  
55  
56  
57  
58  
59  
60

1  
2 1 changes in household income and chronic disease over time associated changes in the population  
3  
4 2 composition due to immigration that took place in urban Saskatchewan over the study period.<sup>15,16</sup>  
5  
6  
7 3

8  
9 4 In rural areas the likelihood of diabetes was less in the high school educated group than in the post-  
10  
11 5 secondary education group. In Saskatchewan, less educated rural residents may work physically  
12  
13 6 demanding jobs in farming communities, which could explain the lower likelihood of diabetes.<sup>17</sup>  
14  
15  
16 7

17  
18 8 Our results suggest that caution should be exercised when interpreting results of studies about health  
19  
20 9 inequalities in rural settings. Area based measures of deprivation are less similar to individual level  
21  
22 10 measures of deprivation in rural areas.<sup>18</sup> In rural settings, area units encompass considerably larger  
23  
24  
25 11 geographic areas and greater heterogeneity in socioeconomic status than seen in geographically smaller  
26  
27 12 urban areas of equal population size.<sup>19</sup> Multifactor deprivation indices may have too many factors to be  
28  
29 13 effective in rural settings and single item area based measures may be preferable in rural settings.<sup>5,20</sup>  
30  
31

32 14 Overall, and consistent with recent assessment of the practical utility of diabetes intervention research,  
33  
34 15 more evidence is needed to inform and tailor preventive measures based on individual and area level  
35  
36 16 SES factors.<sup>21</sup>  
37  
38  
39 17

### 40 41 18 *Limitations*

42  
43 19 Our work has a number of limitations related to the use of health administrative, census geography  
44  
45 20 data, and representation of Indigenous and First Nations populations. The use of health administrative  
46  
47 21 data for research is common and there is limited risk of bias if proper procedures are used.<sup>22,23</sup> In  
48  
49 22 Saskatchewan, approximately 33% of general practitioners, and 38% of specialists shadow bill (ie,  
50  
51 23 submit billings despite being salaried and not being paid directly from billings). Physicians typically do  
52  
53  
54 24 not shadow bill 100% of their work but there is no audit done to assess its prevalence or accuracy in  
55  
56  
57  
58  
59  
60

1  
2 1 Saskatchewan.<sup>24</sup> Given the long period of study it is also possible that physician turnover and changes  
3  
4 2 in diagnostic practices over time have affected results.<sup>25</sup>  
5  
6  
7 3

8  
9 4 We used deprivation data from the 2006 census. Our method assumes no change in area level  
10  
11 5 deprivation between 2007 and 2015 in Saskatchewan, leading to potential misclassification.

12  
13 6 Comparisons of area level deprivation between 2001 and 2006 show that 45% of Dissemination Area  
14  
15 7 did not change deprivation quintiles and 37% of changes were within 1 deprivation quintile. There is  
16  
17 8 also potential misclassification of postal codes to dissemination areas.  
18  
19  
20 9

21  
22 10 Our analysis did not include potentially relevant covariates including demographic changes or  
23  
24 11 migration patterns. Our analyses do not include on reserve First Nations communities. Both the  
25  
26 12 Canadian Community Health Survey and Census based deprivation index do not include on reserve  
27  
28 13 First Nations communities, meaning these groups are excluded from the analysis. Over half of the  
29  
30 14 Indigenous population of Saskatchewan lives off reserve areas, however, we cannot identify this  
31  
32 15 population because there is no measure of Indigenous or First Nations status in the Saskatchewan  
33  
34 16 Health Administrative data.<sup>26</sup>  
35  
36  
37  
38  
39 17

## 40 41 18 **Conclusion**

42  
43 19 This study examines individual and area level SES inequalities in diabetes in Saskatchewan from 2007  
44  
45 20 to 2012. Results show that area level socioeconomic deprivation is associated with a greater likelihood  
46  
47 21 of diabetes, when controlling for individual level income and education. Our results further suggest that  
48  
49 22 this relationship is mediated by whether people reside in urban or rural areas and that area level  
50  
51 23 socioeconomic factors should especially be considered in strategies for diabetes prevention in urban  
52  
53 24 settings.  
54  
55  
56  
57 25  
58  
59  
60

1  
2  
3  
4  
5  
6  
7  
8  
9  
10  
11  
12  
13  
14  
15  
16  
17  
18  
19  
20  
21  
22  
23  
24  
25  
26  
27  
28  
29  
30  
31  
32  
33  
34  
35  
36  
37  
38  
39  
40  
41  
42  
43  
44  
45  
46  
47  
48  
49  
50  
51  
52  
53  
54  
55  
56  
57  
58  
59  
60

1 Targeted measures designed to improve health equity are a key instrument for improving population  
2 health. Our results suggest that the most effective approach to doing so is likely to vary between urban  
3 and rural settings. Place based interventions are more likely to work in cities where populations are  
4 densely distributed but in rural areas targeting should be guided by individual characteristics.  
5

Confidential

1  
2  
3  
4  
5  
6  
7  
8  
9  
10  
11  
12  
13  
14  
15  
16  
17  
18  
19  
20  
21  
22  
23  
24  
25  
26  
27  
28  
29  
30  
31  
32  
33  
34  
35  
36  
37  
38  
39  
40  
41  
42  
43  
44  
45  
46  
47  
48  
49  
50  
51  
52  
53  
54  
55  
56  
57  
58  
59  
60

1 **Contributorship Statement**

2 DF, CN, and SL conceptualized the research question and analysis. DF, JN, SL, LT, HR, and TB  
3 conducted data analysis. All authors commented on a reviewed draft versions of the manuscript. All  
4 authors reviewed the final version of the manuscript prior to submission.

5

Confidential

1  
2 1 **References**  
3

- 4 2 1. Agardh E, Allebeck P, Hallqvist J, Moradi T, Sidorchuk A. Type 2 diabetes incidence and  
5 3 socio-economic position: a systematic review and meta-analysis. *International Journal of*  
6 4 *Epidemiology*. 2011;40(3):804-818. doi:10.1093/ije/dyr029.
- 8 5 2. Lemstra M, Neudorf C, Opondo J. Health Disparity by Neighbourhood Income. *Canadian*  
9 6 *Journal of Public Health*. 2006;97(6):435-439.
- 12 7 3. Gabb G, Arnolda L. Geographic location as a modifiable cardiac risk factor. *Canadian*  
13 8 *Medical Association Journal*. 2017;189(13):E482-E483. doi:10.1503/cmaj.170116.
- 15 9 4. Cox M, Boyle PJ, Davey PG, Feng Z, Morris AD. Locality deprivation and Type 2  
16 10 diabetes incidence: A local test of relative inequalities. *Am J Public Health*.  
17 11 2007;65(9):1953-1964. doi:10.1016/j.socscimed.2007.05.043.
- 20 12 5. Terashima M, Rainham DGC, Levy AR. A small-area analysis of inequalities in chronic  
21 13 disease prevalence across urban and non-urban communities in the Province of Nova  
22 14 Scotia, Canada, 2007–2011. *BMJ Open*. 2014;4(5):e004459. doi:10.1136/bmjopen-2013-  
23 15 004459.
- 25 16 6. Pampalon R, Martinez J, Hamel D. Does living in rural areas make a difference for health  
26 17 in Québec? *Health & Place*. 2006;12(4):421-435. doi:10.1016/j.healthplace.2005.04.002.
- 28 18 7. World Health Organization. *Urban HEART: Urban Health Equity Assessment and*  
29 19 *Response Tool: User Manual.*; 2010.
- 32 20 8. Canada Poste. Postal Code Conversion File, Reference Guide.  
33 21 [https://www.canadapost.ca/cpc/assets/cpc/uploads/files/marketing/2017-postal-code-](https://www.canadapost.ca/cpc/assets/cpc/uploads/files/marketing/2017-postal-code-conversion-file-reference-guide-en.pdf)  
34 22 [conversion-file-reference-guide-en.pdf](https://www.canadapost.ca/cpc/assets/cpc/uploads/files/marketing/2017-postal-code-conversion-file-reference-guide-en.pdf). Accessed August 2, 2019.
- 36 23 9. Statistics Canada. 2006 Candian Census of the Population.  
37 24 <https://www12.statcan.gc.ca/datasets/Index-eng.cfm>. Accessed October 31, 2018.
- 39 25 10. Public Health Agency of Canada. *Report From the Canadian Chronic Disease*  
40 26 *Surveillance System: Hypertension in Canada*. 2010.
- 43 27 11. Pampalon R, Hamel D, Gamache P. A deprivation index for healthy planning. *Chronic*  
44 28 *Diseases in Canada*. 2011;29(4):178-191.
- 46 29 12. Rachele JN, Giles-Corti B, Turrell G. Neighbourhood disadvantage and self-reported type  
47 30 2 diabetes, heart disease and comorbidity: a cross-sectional multilevel study. *Annals of*  
48 31 *Epidemiology*. 2016;26(2):146-150. doi:10.1016/j.annepidem.2015.11.008.
- 50 32 13. Grundmann N, Mielck A, Siegel M, Maier W. Area deprivation and the prevalence of type  
51 33 2 diabetes and obesity: analysis at the municipality level in Germany. *BMC Public Health*.  
52 34 2014;14(1):1953. doi:10.1186/1471-2458-14-1264.
- 55 35 14. Rivera LA, Lebenbaum M, Rosella LC. The influence of socioeconomic status on future  
56 36 risk for developing Type 2 diabetes in the Canadian population between 2011 and 2022:

- 1  
2 1 differential associations by sex. *Int J Equity Health*. 2015;14(1):101. doi:10.1186/s12939-  
3 2 015-0245-0.  
4
- 5 3 15. Chiu M, Austin PC, Manuel DG, Tu JV. Comparison of cardiovascular risk profiles among  
6 4 ethnic groups using population health surveys between 1996 and 2007. *CMAJ*.  
7 5 2010;182(8):E301-E310. doi:10.1503/cmaj.091676.  
8
- 9  
10 6 16. Quan H, Fong A, De Coster C, et al. Variation in health services utilization among ethnic  
11 7 populations. *Canadian Medical Association Journal*. 2006;174(6):787-791.  
12 8 doi:10.1503/cmaj.050674.  
13
- 14 9 17. Dyck R, Karunanayake C, Pahwa P, et al. Prevalence, risk factors and co-morbidities of  
15 10 diabetes among adults in rural Saskatchewan: the influence of farm residence and  
16 11 agriculture-related exposures. *BMC Public Health*. 2013;13(1):666. doi:10.1186/1471-  
17 12 2458-13-7.  
18
- 19  
20 13 18. Barnett S, Roderick P, Martin D, Diamond I. A multilevel analysis of the effects of rurality  
21 14 and social deprivation on premature limiting long term illness. *Journal of Epidemiology &*  
22 15 *Community Health*. 2001;55(1):44-51. doi:10.1136/jech.55.1.44.  
23
- 24 16 19. Schuurman N, Bell N, Dunn JR, Oliver L. Deprivation Indices, Population Health and  
25 17 Geography: An Evaluation of the Spatial Effectiveness of Indices at Multiple Scales.  
26 18 *Journal of Urban Health : Bulletin of the New York Academy of Medicine*.  
27 19 2007;84(4):591-603. doi:10.1007/s11524-007-9193-3.  
28
- 29  
30 20 20. Mustard CA, Derksen S, Berthelot J-M, Wolfson M. Assessing ecologic proxies for  
31 21 household income: a comparison of household and neighbourhood level income measures  
32 22 in the study of population health status. *Health & Place*. 1999;5(2):157-171.  
33 23 doi:10.1016/S1353-8292(99)00008-8.  
34
- 35 24 21. Cefalu WT, Buse JB, Tuomilehto J, et al. Update and Next Steps for Real-World  
36 25 Translation of Interventions for Type 2 Diabetes Prevention: Reflections From a Diabetes  
37 26 Care Editors' Expert Forum. *Dia Care*. 2016;39(7):1186-1201. doi:10.2337/dc16-0873.  
38
- 39  
40 27 22. van Walraven C, Austin P. Administrative database research has unique characteristics that  
41 28 can risk biased results. *Journal of Clinical Epidemiology*. 2012;65(2):126-131.  
42 29 doi:10.1016/j.jclinepi.2011.08.002.  
43
- 44 30 23. A Virnig B, McBean M. Administrative Data for Public Health Surveillance and Planing.  
45 31 <http://dxdoiorg/101146/annurevpublhealth221213>. 2003;22(1):213-230.  
46 32 doi:10.1146/annurev.publhealth.22.1.213.  
47
- 48  
49 33 24. Canadian Institutes for Health Information. Data Quality Documentation, Discharge  
50 34 Abstract Database—Current-Year Information, 2012–2013.  
51 35 [https://www.cihi.ca/sites/default/files/dad\\_data\\_quality\\_12\\_13\\_en\\_0.pdf](https://www.cihi.ca/sites/default/files/dad_data_quality_12_13_en_0.pdf). Accessed August  
52 36 2, 2019.  
53
- 54 37 25. Song Y, Skinner J, Bynum J, Sutherland J, Wennberg JE, Fisher ES. Regional Variations  
55 38 in Diagnostic Practices. *N Engl J Med*. 2010;363(1):45-53. doi:10.1056/NEJMsa0910881.  
56  
57  
58  
59  
60

1  
2 1 26.  
3 2  
4 3  
5  
6 4  
7  
8 5  
9  
10  
11  
12  
13  
14  
15  
16  
17  
18  
19  
20  
21  
22  
23  
24  
25  
26  
27  
28  
29  
30  
31  
32  
33  
34  
35  
36  
37  
38  
39  
40  
41  
42  
43  
44  
45  
46  
47  
48  
49  
50  
51  
52  
53  
54  
55  
56  
57  
58  
59  
60

Statistics Canada. Focus on Geography Series, 2016 Census.  
<https://www12.statcan.gc.ca/census-recensement/2016/as-sa/fogs-spg/Facts-pr-eng.cfm?LANG=Eng&GK=PR&GC=47&TOPIC=9>.

Confidential



1  
2  
3  
4  
5  
6  
7  
8  
9  
10  
11  
12  
13  
14  
15  
16  
17  
18  
19  
20  
21  
22  
23  
24  
25  
26  
27  
28  
29  
30  
31  
32  
33  
34  
35  
36  
37  
38  
39  
40  
41  
42  
43  
44  
45  
46  
47  
48  
49  
50  
51  
52  
53  
54  
55  
56  
57  
58  
59  
60

1 Figure 1. Flow chart of diabetes case selection from health administrative data, Canadian Community  
2 Health Survey link file data, and Census data, Saskatchewan, 2007-2012.  
3

Confidential

1  
2  
3  
4  
5  
6  
7  
8  
9  
10  
11  
12  
13  
14  
15  
16  
17  
18  
19  
20  
21  
22  
23  
24  
25  
26  
27  
28  
29

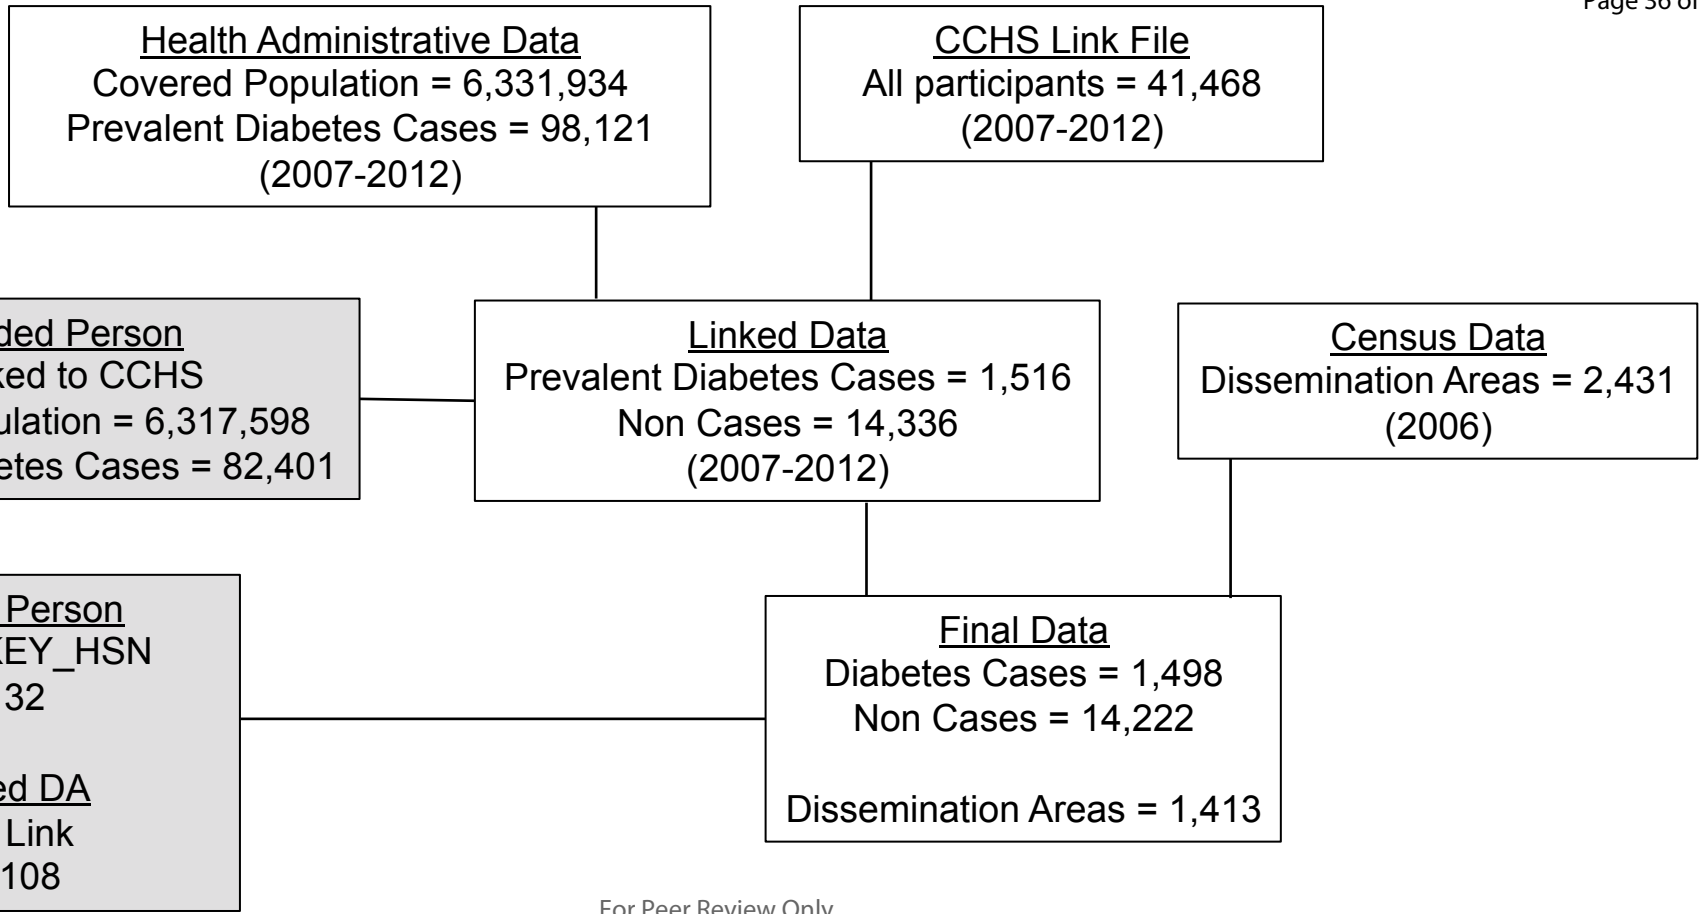

Table 1. Descriptive statistics for participants from health administrative, Canadian Community Health Survey, and Census data, Saskatchewan, 2007-2013.

|                       | Unweighted Sample<br>Size | Weighted Percent |
|-----------------------|---------------------------|------------------|
| Diabetes              |                           |                  |
| Yes                   | 1498                      | 7.6%             |
| No                    | 14222                     | 92.4%            |
| Level 1               |                           |                  |
| Age                   |                           |                  |
| <35                   | 4955                      | 38.5%            |
| 35-44                 | 1831                      | 13.8%            |
| 45-59                 | 3500                      | 24.8%            |
| 60-79                 | 4118                      | 18.4%            |
| >80                   | 1316                      | 4.5%             |
| Gender                |                           |                  |
| Male                  | 7117                      | 49.4%            |
| Female                | 8603                      | 50.6%            |
| Income                |                           |                  |
| \$0-\$19,999          | 3273                      | 21.4%            |
| \$20,000-\$49,999     | 2958                      | 24.6%            |
| \$50,000-\$79,999     | 2694                      | 24.7%            |
| >\$80,000             | 2662                      | 29.4%            |
| Missing               | 4133                      |                  |
| Education             |                           |                  |
| Less than High School | 4505                      | 24.2%            |
| High School           | 3932                      | 27.5%            |
| Postsecondary         | 7200                      | 48.3%            |
| Level 2               |                           |                  |
| Deprivation           |                           |                  |
| Q1 Least Deprived     | 2315                      | 22.9%            |
| Q2                    | 2586                      | 21.3%            |
| Q3                    | 2613                      | 19.8%            |
| Q4                    | 2331                      | 17.2%            |
| Q5 Most Deprived      | 2628                      | 18.9%            |
| Geography             |                           |                  |
| Urban                 | 10485                     | 77.7%            |
| Rural                 | 5235                      | 22.3%            |

Table 2. Results from multilevel logistic regression analysis of prevalent diabetes cases in Saskatchewan, 2007-2012.

|                          | Saskatchewan <sup>a</sup>  | Urban <sup>b</sup>         | Rural <sup>c</sup>         |
|--------------------------|----------------------------|----------------------------|----------------------------|
|                          | Adjusted OR, 95% CI        | Adjusted OR, 95% CI        | Adjusted OR, 95% CI        |
| <b>Level 2</b>           |                            |                            |                            |
| <b>Deprivation</b>       |                            |                            |                            |
| Q1 Least Deprived        | <b>0.40 (0.18 to 0.88)</b> | <b>0.32 (0.13 to 0.78)</b> | 0.84 (0.13 to 5.43)        |
| Q2                       | 0.59 (0.29 to 1.22)        | 0.53 (0.23 to 1.25)        | 0.80 (0.16 to 4.01)        |
| Q3                       | 0.74 (0.36 to 1.51)        | 0.70 (0.31 to 1.63)        | 1.02 (0.20 to 5.14)        |
| Q4                       | 0.80 (0.38 to 1.68)        | 0.75 (0.32 to 1.74)        | 1.11 (0.20 to 6.23)        |
| Q5 Most Deprived         | 1                          | 1                          | 1                          |
| <b>Geography</b>         |                            |                            |                            |
| Urban                    | <b>0.46 (0.27 to 0.79)</b> |                            |                            |
| Rural                    | 1                          |                            |                            |
| <b>Level 1</b>           |                            |                            |                            |
| <b>Income</b>            |                            |                            |                            |
| \$0-\$19,999             | 1                          | 1                          | 1                          |
| \$20,000-\$49,999        | <b>0.64 (0.63 to 0.65)</b> | <b>0.55 (0.54 to 0.57)</b> | <b>0.91 (0.88 to 0.94)</b> |
| >\$50,000-\$79,000       | <b>0.65 (0.64 to 0.67)</b> | <b>0.62 (0.60 to 0.63)</b> | <b>0.68 (0.66 to 0.71)</b> |
| >\$80,000                | <b>0.64 (0.63 to 0.66)</b> | <b>0.72 (0.70 to 0.73)</b> | <b>0.43 (0.41 to 0.45)</b> |
| <b>Education</b>         |                            |                            |                            |
| Less than High School    | <b>1.51 (1.49 to 1.54)</b> | <b>1.50 (1.47 to 1.53)</b> | <b>1.43 (1.39 to 1.48)</b> |
| High School              | <b>1.08 (1.06 to 1.10)</b> | <b>1.16 (1.14 to 1.19)</b> | <b>0.87 (0.84 to 0.91)</b> |
| Postsecondary            | 1                          | 1                          | 1                          |
| -2 Log Pseudo-Likelihood | 1235864                    | 1626750                    | 497563                     |

Notes. <sup>a</sup> Model controlling for year, age, and gender. <sup>b,c</sup> Models controlling for year, age, and gender.
